# Supplementary material for: The origin of photoactivated adenylyl cyclase (PAC), the Euglena blue-light receptor: phylogenetic analysis of orthologues of PAC subunits from several euglenoids and trypanosome-type adenylyl cyclases from Euglena gracilis
Source: Royal Society of Chemistry journal article supplement (doi:10.1039/b316075k), 2004-06-01
Supplement: b316075k.pdf [file b316075k.pdf]

“Where did photoactivated adenylyl cyclase (PAC), the *Euglena* blue-light receptor, come from?: phylogenetic analysis of orthologues of PAC subunits from several euglenoids and trypanosome-type adenylyl cyclases from *Euglena gracilis*”

Yoshiko Koumura, Takeshi Suzuki, Shinya Yoshikawa, Masakatsu Watanabe and Mineo Iseki

**Figure S1** Multiple alignment of deduced amino acid sequences of the cDNAs similar to that of PAC subunits. The sequences were aligned using Clustal X. Fully conserved amino acid residues are shown in red. Possible flavin binding domains are indicated by a blue background, while possible catalytic domains of adenylyl cyclase by a yellow background.

|                |                                 |                                               |                             |                |     |
|----------------|---------------------------------|-----------------------------------------------|-----------------------------|----------------|-----|
| PAC $\alpha$   | -MYILVWKEGQQIRTFQDLEECGQFQTASNI | TD--GQIFSVINVTPTMSKGGETG---                   | ETQ                         | 54             |     |
| AlPAC $\alpha$ | -MYILVWKEGQQIKTFQDLEECGQFQIASNI | TD--GQIFSVSVTPTMSKGGETG---                    | ETQ                         | 54             |     |
| KqPAC1         | -MYILVWKDGGQVKNFQDLEECGAFQTAANI | VD--GQIFNVGVTSAMNKGDDTG---                    | EVQ                         | 54             |     |
| EsPAC1         | -MYILVWKEGQQIKTFQDLEECGQFQTACNI | SD--GQIFSVNVAPTMSKGGESG---                    | EQL                         | 54             |     |
| CsPAC1         | -MYILVWKEGQQIKTFQDLEECGQFQTASNI | SD--GQTFSINVSPVMSKGGETG---                    | ETQ                         | 54             |     |
| EtgPAC1        | -MYVLVWKNNGQQVKT                | FETLDGANSYKTGSNIADDDSNIFHIDVIPAQSAGSAGGGNVDPK |                             | 59             |     |
| EtvPAC1        | -MYVLIWKS                       | GQQIQTFPDLEAASQFKAASNI                        | IED--SFIFSVSVTPTMLAGGAAG--- | ESG            |     |
| EsPAC2         | -MYILVWKKGQQIKS                 | FHTLDEAAEFKAASNI                              | IDE--AQMFSITVAPAISASGGTNE-- | ATN            |     |
| PAC $\beta$    | -MYILVWKKGQQIKT                 | FHTLDEAAQFKAASNI                              | IDE--AQMFSVTVAPAISASGGSNE-- | ATN            |     |
| AlPAC $\beta$  | -MYILVWKR                       | GQQIKTFHTLDEAANFKAASNI                        | IDE--AQMFSITVAPAISASGGSNE-- | ATN            |     |
| CsPAC2         | -MYILVWKKGQQIKT                 | FHTLDEAAQFKAASNI                              | IDD--AQMFSINVAPAVSASGGSNE-- | ATN            |     |
| KqPAC2         | -MHVLIWKKGQQIKT                 | FHTLDEAAQFKAASNI                              | IDD--AQIFNVSVTPAISASGGSNE-- | ATN            |     |
| EtgPAC2        | -MFLLVWKKGQQMAT                 | FHTLEESNEFKAASNI                              | IED--SHVFHLKLTPTTSGAGGANN-- | ATG            |     |
| EtvPAC2        | MVFLLVWKNGTQLKS                 | FLTLDDATQYKTASSI                              | IDD--AQIYNVAFTPAVSGDGGSNE-- | ATN            |     |
|                |                                 |                                               |                             |                |     |
| PAC $\alpha$   | LRRLMYLSASTEPEKCN               | AEYLA                                         | DMAHVATLRNKQIGVSGFLLYSS     | PPFFQVIEGTDEDL | 114 |
| AlPAC $\alpha$ | LRRLMYLSASTEPEKCN               | AEYLA                                         | DMAHVATLRNKQIGVSGFLLYSS     | PPFFQVIEGTDEDL | 114 |
| KqPAC1         | LRRLMYLSASTEPEECT               | TEYLAELARASSLRNKEIGVSGFLLYS                   | APFFQVIEGTDEDL              |                | 114 |
| EsPAC1         | LRRLMYLSKSTEPEACN               | AEYLAQMAFVATCVNSTIGVSGFLLYS                   | APFFQVIEGTDDDL              |                | 114 |
| CsPAC1         | LRRLMYLSASTEPE                  | RCDEYLAEMAHVATLRNSEIGVSGFLLYS                 | APFFQVIEGTDEDL              |                | 114 |
| EtgPAC1        | LRRLMYLSKTTEAEL                 | CTPEYLA                                       | DMAHVATLRNMEIGVSGFLLYS      | APFFQVIEGTDEDL | 119 |
| EtvPAC1        | LRRLMYLSKATEP                   | DECTPEFLAELAHVATLRNQEIGVSGFLLYS               | APFFQVIEGTDEDL              |                | 114 |
| EsPAC2         | LRRLMYLSKSTNPEE                 | CDPAFLAEMAGIATIRNKEIGVSGFLMYSS                | PPFFQVIEGTDEDL              |                | 115 |
| PAC $\beta$    | LRRLMYLSKSTNPEE                 | CNPQFLAEMARVATIRNREIGVSGFLMYSS                | PPFFQVIEGTDEDL              |                | 115 |
| AlPAC $\beta$  | LRRLMYLSKSTNPEE                 | CNPQFLAEMARVATLRNREIGVSGFLMYSS                | PPFFQVIEGTDEDL              |                | 115 |
| CsPAC2         | LRRLMYLSKSTEPEK                 | CDVPYLAEMAGIATLRNREIGVSGFLMYSS                | PPFFQVIEGTDEDL              |                | 115 |
| KqPAC2         | LRRLMYLSKSTNPEE                 | CTPQFLAELGR                                   | ISSIRNKEIGVSGFLMYS          | APFFQVIEGTDEDL | 115 |
| EtgPAC2        | FRRLMYLSKSTEAE                  | EVNSTYLAEMAGIATIRNQEIGVSGFLMYSD               | PPFFQVIEGTDEDL              |                | 115 |
| EtvPAC2        | LRRLMYLSKSTEPEL                 | VNTQYLAEMAHVATLRNQCIGVSGFLMYSH                | PPFFQVIEGTDEDL              |                | 116 |

|                |                                                                 |     |
|----------------|-----------------------------------------------------------------|-----|
| PAC $\alpha$   | FLFAKISADPRHERCIVLANGPCTGRMYGEWHMKDSHIDNITKHPAIKTILFQIARSFSS    | 174 |
| AlPAC $\alpha$ | FLFAKISSDPRHERCIVLANGPCTGRMYGEWHMKDSHIDNITKHPAIKTILFQIARSFSS    | 174 |
| KqPAC1         | FLFAKISSDPRHEKCIVLANGPCTGRLYGEWHMKDSHIDNITKHPAIKTILFQIAKSFSS    | 174 |
| EsPAC1         | WLYAKISRDPHERCIVLANGPCTGRMYGEWHMKDSHIDNITKHPAIKTILFQIARSFSS     | 174 |
| CsPAC1         | FLFAKIGADPRHERCIVLANGPCTGRLYGEWHMKDSHIDNITKHPAIKTILYQIARSFSS    | 174 |
| EtgPAC1        | FLFAKIGADPRHERCIVLANGPCTGRLYGDWHMKDSHIENITSHPAIKTILYQIARSFSS    | 179 |
| EtvPAC1        | FLFGKIGLDTRHEACIVLANGPCSGRMYGEWHMKDSHIDNITKHPAIKTILYQIARSFSS    | 174 |
| EsPAC2         | FLFAKISADPRHEKCIVLANGPCTGRMYGDWHMKDSHIDSITTHPAMKTILYQIARSFSS    | 175 |
| PAC $\beta$    | FLFAKISADPRHERCIVLANGPCTGRMYGDWHMKDSHMDSITTHPAMKTILYQIARSFSS    | 175 |
| AlPAC $\beta$  | FLFAKISADPRHERCIVLANGPCTGRMYGDWHMKDSHIDSITTHPAMKTILYQIARSFSS    | 175 |
| CsPAC2         | FLFAKIGADPRHERCIVLANGPCTGRMYGDWHMKDSHIDSITTHPAMKTILYQIARSFSS    | 175 |
| KqPAC2         | FLFSKISMDDRHDRCIVLANGPCTGRMYGDWHMKDSHIDSITTHPAMKTILYQIARSFSS    | 175 |
| EtgPAC2        | FLFAKIGADPRHERCIVLANGPCTGRLYGDWHMKDSHIDSITSHPAMKTILYQIARSFSS    | 175 |
| EtvPAC2        | FLFAKIGIDPRHERCIVLANGPCTGRLYGDWHMKDSHIDSITSHPAMKTILYQIARSFSS    | 176 |
|                |                                                                 |     |
| PAC $\alpha$   | MWSYLPKNAANMLLLGKNPNKQAPEPMSVVVTFIYLVFESSILAHPLTEQCADILAAFV     | 234 |
| AlPAC $\alpha$ | MWSYLPKNAANMLLLGKNPNKQAPEPMSVVVTFIYLVFESSILAHPLTEQCADILAAFV     | 234 |
| KqPAC1         | MWSYLSKNTANMLLLGKQPNKQAPEPMSVVVISFIYLVFESSILAHPLTEQCADVLAFAFV   | 234 |
| EsPAC1         | MWSYLPKNAANMLLLGKEPNKQAPEPMSVVITFIYLVFESSILAHPLTEQCADILEAFV     | 234 |
| CsPAC1         | MWSYLPKNAANMLLLGKNPNKQAPEPMSVVVTFIYLVFESSILAHPLTEQCADVLAFAFV    | 234 |
| EtgPAC1        | MWSYLPKNAANMLLLGKNPNKQTPPEPMSVVVTFIYLVFESSILAHPLTEQVADVLSHFV    | 239 |
| EtvPAC1        | MWAYLPKQAGNMLLLGKEPNKQPEPMSAVVSFIYLVFESTILANPNLTEQVADILIAFV     | 234 |
| EsPAC2         | MWSYLPKSAGNMLLLGKDPAAQPEPMSVIVTFIYLVFESSILSNPDLTEQAAEVLSTFV     | 235 |
| PAC $\beta$    | MWSYLPKSAGNMLLLGKDPAAQPEPMSVVVTFIYLVFESSILSNPNLTEQAAEVLSTFV     | 235 |
| AlPAC $\beta$  | MWSYLPKSAGNMLLLGKDPAAQPEPMSVVVTFIYLVFESSILSNPNLTEQAAEVLSTFV     | 235 |
| CsPAC2         | MWSYLPKSAGNMLLLGKDPASQPEPMSVVVTFIYLVFESSILSNPNLTEQAAEVLSTFV     | 235 |
| KqPAC2         | MWSYLPKSTGNMLLLGKDPAAQPPVPMVVVTFIYLVFESSILSKPNLTEQAAEVLSTFV     | 235 |
| EtgPAC2        | MWSYLPKSAGHMLLLGKDPNKQPEPMSVVVTFIYLVFESSILSHPLTEQCAEVLSTFV      | 235 |
| EtvPAC2        | MWSYLPKSAGNTLLGKDPAAQPEPMSVVVTFIYLVFESSILSHPLTEQCAEVLSTFV       | 236 |
|                |                                                                 |     |
| PAC $\alpha$   | DACVRNVEGTGGQVAKFITGICMAYWPINRAEDALVGLQQLSEDLAELRSQQPPGSALSLSL  | 294 |
| AlPAC $\alpha$ | DACVRNVEGTGGQVAKFITGICMAYWPINRAEDALVGLQQLSEDLAELRSQQPPGSALSLSL  | 294 |
| KqPAC1         | DVCVRNIEGTGGHVAKFITGICMAYWPSNRAEDALVGLQQLSDDLAEELRSQQPPGSALSLSL | 294 |
| EsPAC1         | DACVRNIEGTGGQVAKFITGICMAYWPINRAEDAIVGLQQLSEDLAELRSQQPPGSALSLSL  | 294 |
| CsPAC1         | DACVRNVEGTGGQIAKFITGICMAYWPINRAEDALVGLQQLSEDLAELRSQQPPGSALSLSL  | 294 |
| EtgPAC1        | DICVRNIEGSGGAIKFITGITMAYWPINRAEDALLALQQLINEDLAQLRSQQPPGSALSLSL  | 299 |
| EtvPAC1        | DSCVKNVEGSGGSVAKFITGICMAYWPINRAEDALLGLQAISSDLAEELRAHQPPGSALSLSL | 294 |
| EsPAC2         | DVCVKNVEGSGGNIKFITGICMAYWPINRAEDALTSIQQISEDLAQLRSQQAPGSAITL     | 295 |
| PAC $\beta$    | DVCVKNVEGSGGNIKFITGICMAYWPINRTEALTAIQQISEDLAQLRSQQAPGSAVSL      | 295 |
| AlPAC $\beta$  | DVCVKNVEGSGGNIKFITGICMAYWPINRTEALNAIQQISEDLAQLRSQQAPGSAISL      | 295 |
| CsPAC2         | DVCVKNVEGSGGNIKFITGICMAYWPINRAEDALTSIQQISEDLAQLRSQQAPGSAVSL     | 295 |
| KqPAC2         | DVCVKNVEGSGGNIKFITGICMAYWPINRAEDAIQAIQQISDDLAEELRSQQPPGSAISL    | 295 |
| EtgPAC2        | DVCVRNVEGSGGNIKFITGICMAYWPINRAEDALTALQQLINEDLAQLRGAQAPGSAISL    | 295 |
| EtvPAC2        | DVCVKNVEGSGGNIKFITGICMAYWPINRAEDALTSIAQISEDLGQLRGQQPPGSALSLSL   | 296 |
|                |                                                                 |     |
| PAC $\alpha$   | IYSRCGVHYGRALLCNAGFRKADFTLLGDCINTASRITSLSVKLKVPLLLSFEVRCLLGD    | 354 |
| AlPAC $\alpha$ | IYSRCGVHYGRALLCNAGFRKADFTLLGDCINTASRITSLSVKLKVPLLLSFEVRCLLGD    | 354 |
| KqPAC1         | VYSRCGVHYGRALLCNAGIKKADFTLLGDCINTASRITSLAGLKVPLLLSFEVRCLLGA     | 354 |
| EsPAC1         | VYSRCGVHYGRALLCNAGFRKADFTLLGDCINTASRITSLSVKLKVPLLLSFEVRCLLGD    | 354 |
| CsPAC1         | VYSRCGVHYGRALLCNAGTRKSDFTLLGDCINTASRITSLSVKLKNVPLLLSFEVRCLLGD   | 354 |
| EtgPAC1        | MYGRAGVHYGRALLCNAGVRKSDFTLLGDCINTASRVTSLATQLKSPLLFSEVRCLLGD     | 359 |
| EtvPAC1        | VYSRAGVHYGRALLCNAGMQKSDFTLLGDCINTASRVTSLSVQLKVPLLFSEVRCLLGD     | 354 |
| EsPAC2         | MYSQAGVHYGRAMLCNAGTRKSDFTLLGDCINTTSRVATLAKKLTPLLFSEVRCLLGD      | 355 |
| PAC $\beta$    | MYSQAGVHYGRAMLCNAGSRKSDFTLLGDCINTTSRIATLAKKLTPLLFSEVRCLLGD      | 355 |
| AlPAC $\beta$  | MYSQAGVHYGRAMLCNAGSRKSDFTLLGDCINTTSRIATLAKKLTPLLFSEVRCLLGD      | 355 |
| CsPAC2         | MYSQAGVHYGRAMLCNAGTRKSDFTLLGDCINTTSRVATLAKKLTPLLFSEVRCLLGD      | 355 |
| KqPAC2         | MYSQAGVHYGRALLCNAGTRKSDFTLLGDCINTTSRIATLAKKLTPLLFSEVRCLLGD      | 355 |
| EtgPAC2        | MYSRSGVHYGRAMLCNAGTRKSDFTLLGDCINTASRVASLAVTLKSPLLFSEVRCLLGD     | 355 |

|                |                                                               |     |
|----------------|---------------------------------------------------------------|-----|
| PAC $\alpha$   | EMREELLESSGLHKVKGRDKPVQVYQFN-APELDSAMVRAKIEQFNPGRYRALCPVKPYES | 413 |
| AlPAC $\alpha$ | EMREELLESAGLHKVKGRDKPVQVYQFN-APELDSAVVRTKIEQFNPGRYRALCPVKPYDS | 413 |
| KqPAC1         | EMREELLESAGMHKVKGREQPVQVFYFN-AAEVDSTAVRAKIEQFNPGRYRALCPVKPYDS | 413 |
| EsPAC1         | EMREELENSGLHKVKGRDKPVQVYQFN-APELDSAMVRAKIEQFNPGRYRALCPVKPYDS  | 413 |
| CsPAC1         | EMREELLESAGLHKVKGRDKPVQVYQFN-APELDSAQVRAKIESFNPGRFRCMPVKPYDS  | 413 |
| EtgPAC1        | DMRDELESAGMHKVKGRDKPVAVYQFP-CEPLDNDMVRAKIEAFNPGRYRAQFPVVPYDS  | 418 |
| EtvPAC1        | DMREELLESGLGMHKVKGRDKPVAVYQFAGAPELDSAMVKAKEQFNPGRYRAQCPVRELES | 414 |
| EsPAC2         | EMREEIEGAGMHQVKGRVQVYQFP-GPELDEVEMVRQKIDQFNPGRFRCQMPVVDYDS    | 414 |
| PAC $\beta$    | EMREEIEGAGMHQVKGRDKPVVYQFP-GPELDEVEMVRQKIEQFTPGRFRCQMPVVEYEA  | 414 |
| AlPAC $\beta$  | EMREEVEGAGMHQVKGRDKPVVYQFP-GPELDEVEMVRQKIEHFTPGRFRCQMPVVEYES  | 414 |
| CsPAC2         | EMREEIEGAGMHQVKGRDKPVVYQFP-GEELDVDEVVRHKIETFNAGRFRQMPVVEYDT   | 414 |
| KqPAC2         | EMREEIESAGMHQVKGRDKPVVYQFP-GATLDVEVVQKIEQFNPGRFRCQMPVVDYDT    | 414 |
| EtgPAC2        | EMRDEIESAGMHQVKGRDKPVVYQFP-SPIILSDVVVRQKIEQFNPGRYRCSMPVLDYET  | 414 |
| EtvPAC2        | EMRDEIEGAGMHSVKGKDKPVVYQFP-GPELDSGMVRQKIEEFNPGRYRCGMPVMEYES   | 415 |
|                |                                                               |     |
| PAC $\alpha$   | LHPAQRPPIFDDTPRE-NQPK---LSQVQRDSLVDRLSLIAKLAFPS-SMMAGGEGQLI   | 468 |
| AlPAC $\alpha$ | LHPAQRPPIFDDTPRD-SQPK---VNQMQRDSLVDRLSMIAKLAFPS-SMMVGGESQLI   | 468 |
| KqPAC1         | LHPSQKPPIFDDTPRD-SMPR---SGHLQRQDSLVDRLSMIAKLAFPP-SMAAGGESQLI  | 468 |
| EsPAC1         | LSATQKPPIFDDTMRD-GHNK---LSAAQRDSLVDRLSLIAKLAFPP-SMLAGGDGQLI   | 468 |
| CsPAC1         | LHPSQRPPIFDDTPRE-SMPK---LSVVQRDSLVDRLSLIAKLAFPP-NMMNGGDNQLI   | 468 |
| EtgPAC1        | LHGVHKPPIFDDSPKD-PLATRIAQAAGERKDSLIDRLIMISNLAIPA-SMAGGNNQLI   | 476 |
| EtvPAC1        | LHPDVRPPIFDDTPRE-ASMP--KAGAGERRDSLADRLTMIAKLAFP--TIGGTNSQMI   | 469 |
| EsPAC2         | LPVSQRPPIFDDTPKGNPRPRTPGYGGTQRSDSLVDRLIMIAKLAGPS--ASAGDTSLT   | 472 |
| PAC $\beta$    | LPISQRPPIFDDTPKGNPRPRTPGYGGQRQSDSLVDRLIMIAKLAGPS--VSATGDTTTLT | 472 |
| AlPAC $\beta$  | LPISQRPPIFDDTPKGGKPRPRTPGYGGQRQSDSLVDRLIMIAKLAGPS--ISATGDSLT  | 472 |
| CsPAC2         | LHPSQRPPIFDETPKGNPRPRTPGYGGTQRRDSLVDRLIMIAKLAGTT--ASTTGDTTLI  | 472 |
| KqPAC2         | LLPSQRPPIFDETQRDVIKPRVP--GMQRDSLADRLAMIAKLAGTTGGAAGAGDSTLV    | 471 |
| EtgPAC2        | MNPAKRPPIFDNAPKGNPKIG-KKYNAAAHRDSLVDRLTEIARLAFPG--SQAGDSTLI   | 471 |
| EtvPAC2        | LHVSEQPPIFDDTPKGTGTPGTRAWGGTNRKDSLADKLALISQLAGP---LQTSGDTTTLT | 472 |
|                |                                                               |     |
| PAC $\alpha$   | TLTYISQAHPMSRLDLASIQRIAFARNNESSNITGSLLYVSGLFVQTEGPKGAVVSLYL   | 528 |
| AlPAC $\alpha$ | TLTYISQAHPMSRLDLSSIQRVSFSRNESSNITGSLLYVNGLFVQTEGPKSAVVSLYL    | 528 |
| KqPAC1         | GLTYISQASHAMSRLDLSDIQRVAHRNEQVNIACLLYINGLFVQTEGPKSAVVSLYL     | 528 |
| EsPAC1         | TLTYISQASRPMSRLDLSAIHRVAMRRNESSNISGCLLYVNGLFVQTEGPKSAVVSLYL   | 528 |
| CsPAC1         | TLTYISQASYPMSRLDLAAIQRVGCRRNESAIITGSLIYVNGLFVQTEGPKSAVITLYL   | 528 |
| EtgPAC1        | TLTYISHAVKPMMSRLDLAAINRNAVRRNAASKITGTLLYVNGLFVQTEGPKDAVLTLYN  | 536 |
| EtvPAC1        | TLTYVSFSSRPMSRLDLAAIQRVGLRRNSQVDITGSLLYVAPLFVQTEGPKDAVLSVYM   | 529 |
| EsPAC2         | TLTYISLATRPMSRLDLSAIMRTATRNRSSQGITGTLLYINGLFVQTEGPKDAVNLYL    | 532 |
| PAC $\beta$    | TLTYISQATRPMSRLDLSAIMRTATRNRQAQSGITGTLHVNGLFVQTEGPKDAVNLYL    | 532 |
| AlPAC $\beta$  | TLTYISQATRPMSRLDLSAIMRTATRNRQAQSLITGTLLYVNGLFVQTEGPKDAMVNLYL  | 532 |
| CsPAC2         | TLTYISQASRPMSRLDLSAIMRASTRNTQQNITGTLHVNGLFVQTEGPRDAVMNLYL     | 532 |
| KqPAC2         | TLTYISQTVRPMSRLDLAAIMRVATRNRQAQGITGTLHVSGLFVQTEGPRSAVGLYLM    | 531 |
| EtgPAC2        | SLTYLSNSVRPMSRLDLAAIQRALTARNASQGITGCLLYVNGLFVQTEGPRDNVINLYL   | 531 |
| EtvPAC2        | TLTYISHSTRPITRMDLASIQRCALRRNAQHNIITGCLLYVTGLFVQTEGPKDAVINLYH  | 532 |
|                |                                                               |     |
| PAC $\alpha$   | KIRQDKRHKDVVAVFMAPIDERVYGSPLDMTSATEEMLATFPPLQDVLSQLAKSFISLET  | 588 |
| AlPAC $\alpha$ | KIRQDKRHKDVVAVFMAPIEERVYGSPLDMTAATEEMLATFPPLQDVLSQLAKSFISLET  | 588 |
| KqPAC1         | KIRQDPRHKDVVVVHMAPLEERMYRGPLDTTCATDEMLATFPPLQDVLSQLAKSFISLET  | 588 |
| EsPAC1         | KIRQDGRHKDVVTVYMAPLEERVYATALDMTAATEDMLSTFPPLQDVLSQLARSFISLET  | 588 |
| CsPAC1         | KIRQDSRHKDVVIIVFMAPIEERVYSTALDMTSATEEMLATFPPLQDVLSQLAKSFISLET | 588 |
| EtgPAC1        | KVRRDARHEDVVTVHLAPLDERVYDVPFSVTAATDSMLSKFPPLQDVLSQLAKSFISLET  | 596 |
| EtvPAC1        | KIRADPRHRDVVAVYMAPQEERVYNSAFELTTATEEMLSAFPPLQDVLSQLAKSFISLET  | 589 |
| EsPAC2         | RIRQDPRHTAVVTVHQAALQERVYPPPEWTMTSATEEMLATFPPLQDVLSQLAKSFTSLET | 592 |
| PAC $\beta$    | RIRQDPRHTDVTTVHMAPLQERVYPPSEWTLTSATEEMLATFPPLQDVLSQLAKSFTSLET | 592 |
| AlPAC $\beta$  | KIRQDPRHTDVTTVHMAPIQERAYPAEWTLTSATEEMLATFPPLQDVLSQLAKSFTSLET  | 592 |
| CsPAC2         | RIRQDPRHTDVTTVHMANLQERVYPPPEWTLTSASEDMLAAFPPLQDVMSQLAKSFTSLET | 592 |
| KqPAC2         | RIRQDPRHKDVVTVHLAPISERVYPPDWTLTTATEQMLSTFPPLQDVLSQLAKSFTSLET  | 591 |

Supplementary Material (ESI) for Photochemical & Photobiological Sciences

This journal is © The Royal Society of Chemistry and Owner Societies 2004

|                |                                                                                                                                             |     |
|----------------|---------------------------------------------------------------------------------------------------------------------------------------------|-----|
| EtgPAC2        | KIREDP <del>RRHKD</del> VVTVYMPVIQDRVYQEAWTMTTASEDMLATFPPLQDVLSQLAKSFTSLET                                                                  | 591 |
| EtvPAC2        | KIRADARHTD <del>VVT</del> VHQGP IQDRVYASAWAL <del>TNT</del> SEEMLSAFPPLQDVLSQLAKSFTSLET                                                     | 592 |
| PAC $\alpha$   | YVPSTV <del>V</del> RYLTAGNNPRNLQPVSV <del>EV</del> VMLATDICSFTPLSEKCSL <del>TE</del> VWTICNTFIDACT                                         | 648 |
| AlPAC $\alpha$ | YVPSTV <del>V</del> RYLTAGNNPRNLQPVSV <del>EV</del> VMLATDICSFTPLSERCSL <del>TE</del> VWTICNTFIDACT                                         | 648 |
| KqPAC1         | YVPSTIV <del>R</del> YLTSGNNPRNLQPVSV <del>EV</del> VMLATDICSFTPLSEHC <del>SL</del> TEIWTICNTFIDACT                                         | 648 |
| EsPAC1         | YVPSTIV <del>R</del> F <del>L</del> TAGNNPRNLQPVSV <del>D</del> VVMLATDICSFTPLSERCSL <del>TE</del> VWTICNTFIDACT                            | 648 |
| CsPAC1         | YVPSTV <del>V</del> RYLTAGNNPRSLQPVSV <del>EV</del> VMLATDICSFTPLSENC <del>SL</del> TEVWTICNTFIDACT                                         | 648 |
| EtgPAC1        | YVPSTV <del>V</del> R <del>W</del> L <del>T</del> AGNNPRGLHAV <del>S</del> TEVVMFATDICSFTPLSENC <del>SL</del> VEVW <del>L</del> ICNTFIDACT  | 656 |
| EtvPAC1        | YVPSTV <del>V</del> RYLTAGNNPRSLQAI <del>S</del> TGVVMFATDICSFTPLSEKCSL <del>TE</del> VW <del>L</del> ICNTFIDACT                            | 649 |
| EsPAC2         | YVPSTV <del>V</del> RYLTAGNNPRNLM <del>P</del> VSCSVMLATDICSFTSLTEK <del>S</del> SL <del>TE</del> VW <del>M</del> ICNTFIDACT                | 652 |
| PAC $\beta$    | YVPSTV <del>V</del> RYLTAGNNPRNLM <del>P</del> VSCGVMLATDICSFTSLTEK <del>S</del> SL <del>TE</del> VW <del>M</del> ICNTFIDACT                | 652 |
| AlPAC $\beta$  | YVPSTV <del>V</del> RYLTAGNNPRNLM <del>P</del> VSCGVMLATDICSFTSLTEK <del>S</del> SL <del>TE</del> VW <del>M</del> ICNTFIDACT                | 652 |
| CsPAC2         | YVPSTV <del>V</del> RYLTAGNNPRNLM <del>P</del> ISCGVMLATDICSFTSLTEK <del>S</del> SL <del>TE</del> VW <del>M</del> ICNTFIDACT                | 652 |
| KqPAC2         | YVPSTV <del>V</del> RYLTAGNNPRNLV <del>P</del> VSCGVMLATDICSFTSLTEK <del>S</del> SL <del>TE</del> VW <del>L</del> ICNTFIDACT                | 651 |
| EtgPAC2        | YVPSTV <del>V</del> RYLTAGNNPRDL <del>M</del> PVSV <del>E</del> CVMFATDICSFTMLTEK <del>S</del> SL <del>TE</del> VW <del>M</del> ICNTFIDACT  | 651 |
| EtvPAC2        | YVPSTIV <del>R</del> YLTAGNNPRNLR <del>P</del> VSVGVMLATDICSFTMLTEK <del>S</del> SL <del>TE</del> VW <del>M</del> ICNTFIDACT                | 652 |
| PAC $\alpha$   | SAICNEGGEVIK <del>L</del> IGDCVTAYFPPTGADNAVHACQEIVS <del>F</del> CAQLRDAFHDVLD <del>C</del> RSVVAC                                         | 708 |
| AlPAC $\alpha$ | SAICNEGGEVIK <del>L</del> IGDCVTAYFPPTAADNAVHACQEIVS <del>F</del> CAQLRDAFRDVL <del>C</del> RSVVAC                                          | 708 |
| KqPAC1         | SAICSQGGEVIK <del>L</del> IGDCVTAYFPPTSADNAVYACQDIVAF <del>C</del> ANLREAFRDVL <del>C</del> RSVVAC                                          | 708 |
| EsPAC1         | SAICNEGGEVIK <del>L</del> IGDCVTAYFPPHAADNAV <del>S</del> ACQEIVTF <del>C</del> THLREAFKDVLD <del>C</del> RSVIAC                            | 708 |
| CsPAC1         | SAICSEGGGEVIK <del>L</del> IGDCVTAYFPPTSADNAVAACQEIVTF <del>C</del> TQLREAFSDVL <del>C</del> RSVIAC                                         | 708 |
| EtgPAC1        | HSICNKGGEVIK <del>L</del> IGDCVTAYFPDPGADA <del>A</del> VLACQEVVTF <del>C</del> AQLREAFEEVLD <del>C</del> RSVVAC                            | 716 |
| EtvPAC1        | AAIVQERGEVIK <del>L</del> IGDCVTAYFPPTNADGAVMACQEIVAF <del>C</del> TGLRAAFSDVL <del>D</del> VRQVVAC                                         | 709 |
| EsPAC2         | SAICQEGGEVIK <del>L</del> IGDCVTAYFPGNAADAAIAAAQELFM <del>F</del> CTTLRQAFVDVL <del>D</del> VRGCVAC                                         | 712 |
| PAC $\beta$    | SAICQEGGEVIK <del>L</del> IGDCVTAYFPGNNADSAVAAAQELFT <del>F</del> CRQLREAFVDVL <del>D</del> VRGCVSC                                         | 712 |
| AlPAC $\beta$  | SAICQEGGEVIK <del>L</del> IGDCVTAYFPGNGADSAVAAAQELFT <del>F</del> CRQLREAFVDVL <del>D</del> VRGCVSC                                         | 712 |
| CsPAC2         | SAICQEGGEVIK <del>L</del> IGDCVTAYFPGSAADA <del>A</del> VAAAQELYL <del>F</del> CTQLREAFVDVL <del>D</del> VRGCVSC                            | 712 |
| KqPAC2         | NAICQAGGEVIK <del>L</del> IGDCVTAYFPGTAADNAV <del>S</del> AAQELIT <del>F</del> CRELREAFVDVL <del>D</del> VRGCIYC                            | 711 |
| EtgPAC2        | SAICAEGGEVIK <del>L</del> IGDCVTAYFPPSERADNAVAASQELYM <del>F</del> CVHMR <del>E</del> AFQEILD <del>V</del> RACIAC                           | 711 |
| EtvPAC2        | NAVITNGGEVIK <del>L</del> IGDCVTAYFPGHGADGAVAAAQEIF <del>S</del> CTQLREAFADAL <del>D</del> VRSAISA                                          | 712 |
| PAC $\alpha$   | GVGLDFGQV <del>I</del> MAQC <del>S</del> LSGMTEFV <del>V</del> VAGEVSARVMEVEAL <del>T</del> REAGRAIV <del>I</del> TEPVADRLSPKL              | 768 |
| AlPAC $\alpha$ | GVGLDFGQV <del>I</del> MAQC <del>S</del> LSGMTEFV <del>V</del> VAGEVSARVMEVEAL <del>T</del> REAGRAIV <del>I</del> TEPVADRLSPKL              | 768 |
| KqPAC1         | GVGLDFGQV <del>I</del> MAQC <del>S</del> SSGLTEFAV <del>V</del> VAGEVSARVMEVEAL <del>T</del> REAGRAIV <del>L</del> TEPVADHLSPKL             | 768 |
| EsPAC1         | GVGLDFGQV <del>I</del> MAQC <del>S</del> LSGMTEFV <del>V</del> VAGEVSARVMEVEAL <del>T</del> REAGRAIV <del>V</del> TEPVADRLSSRL              | 768 |
| CsPAC1         | GVGLDYGQV <del>V</del> MAQC <del>S</del> LSGMTEFV <del>V</del> VAGEVSARVMEVEAL <del>T</del> REAGFTIV <del>V</del> TEPVADRLSPKL              | 768 |
| EtgPAC1        | GVGLDYGQV <del>V</del> MAQC <del>S</del> SEG <del>M</del> TEYV <del>V</del> VAGEVSARVMEVEAL <del>T</del> RDVARAIV <del>V</del> TEPVADRLSPAM | 776 |
| EtvPAC1        | GVGLDYG <del>D</del> VVMAQC <del>S</del> SMG <del>M</del> TEFV <del>V</del> VAGEVSARVMEVEAL <del>T</del> REVGRAIV <del>I</del> TEPVADRLSPKM | 769 |
| EsPAC2         | GVGLDYGQV <del>V</del> MGQCGT <del>M</del> GLTEFV <del>V</del> VAGAVSARVMEVEAL <del>T</del> REVGRAIV <del>V</del> TEPVADRLSPQM              | 772 |
| PAC $\beta$    | GVGLDYGQV <del>V</del> MAQC <del>S</del> LSGLTEYV <del>V</del> VAGAVSARVMEVEAI <del>T</del> REVGYAIV <del>V</del> TEPVADRLSPQL              | 772 |
| AlPAC $\beta$  | GVGLDYGQV <del>V</del> MAQC <del>S</del> LSGLTEYV <del>V</del> VAGAVSARVMEVESI <del>T</del> REVGYAIV <del>I</del> TEPVADRLSPQL              | 772 |
| CsPAC2         | GVGLDYGQV <del>V</del> MAQC <del>S</del> GLTEYV <del>V</del> VAGAVSARVMEVEAL <del>T</del> REVGHAI <del>V</del> TEPVADRLSPQL                 | 772 |
| KqPAC2         | GVGLDFGQV <del>V</del> MAQC <del>S</del> GLTEY <del>V</del> VAGAVSARVMEVEAL <del>T</del> REVGRAIV <del>L</del> TEPLADRLCPQM                 | 771 |
| EtgPAC2        | GVGLDYGQV <del>V</del> MAQAG <del>S</del> LSGLTEY <del>V</del> VAGAVSARVMEVEALS <del>R</del> DVGRAIV <del>C</del> TEPV <del>V</del> DRLSPHL | 771 |
| EtvPAC2        | GIGLDFGQV <del>V</del> MAQAG <del>S</del> LVTEFAV <del>V</del> VAGSVSARVMEVEAL <del>T</del> RDVGRAIV <del>V</del> TEPVADRLSPQL              | 772 |
| PAC $\alpha$   | RDTGIVPCQEGVDG <del>V</del> PCYGI <del>L</del> GPEWELDVATI <del>K</del> KN <del>I</del> YGFHDARALAAMKKVDD-----                              | 821 |
| AlPAC $\alpha$ | RDTGIVPCQEGVDG <del>V</del> PCYGI <del>L</del> GVEWELDVAII <del>K</del> KN <del>I</del> YGFHEARQAALKKVDD-----                               | 821 |
| KqPAC1         | RDNGLVPCQEGVDG <del>V</del> PCYGI <del>L</del> GAEWELDVVTI <del>K</del> RNI <del>Q</del> NFHAA <del>R</del> AVA <del>A</del> VQKVDD-----    | 821 |
| EsPAC1         | RDSGIVPCQEGVDG <del>V</del> PCYGI <del>L</del> GPEYE <del>L</del> DIVTVKAN <del>I</del> YGFHDARQAALRKADD-----                               | 821 |
| CsPAC1         | RDTGII <del>P</del> CH <del>E</del> GVDG <del>V</del> PCYGI <del>A</del> GDEWVLDIKTI <del>K</del> ANI <del>Y</del> GFHEARQAALRKVDD-----     | 821 |
| EtgPAC1        | RDNGII <del>P</del> CSQGV <del>D</del> IPCYGI <del>L</del> GEEWELDIPTI <del>K</del> ANI <del>K</del> RFHAT <del>R</del> AEIARQKEE-----      | 829 |
| EtvPAC1        | RDTGII <del>P</del> CPQAEGL <del>P</del> CYGI <del>A</del> GDDWLDIVTI <del>K</del> KN <del>I</del> YSFHDRDAVAHAKAAA-----                    | 822 |
| EsPAC2         | RDTGII <del>P</del> CPQAEGL <del>P</del> CYGI <del>A</del> GDDYELDIDEIKRS <del>I</del> KHLHAARS <del>G</del> EKM-----                       | 820 |
| PAC $\beta$    | RDHGIVPTPQAEGL <del>P</del> CYGI <del>A</del> GEEFELDVDSIKRGI <del>K</del> ALHAARS <del>G</del> EKP-----                                    | 820 |
| AlPAC $\beta$  | RDHGII <del>P</del> TPQAEGL <del>P</del> CYGI <del>A</del> GEEFELDVDSIKRGI <del>K</del> ALHAARS <del>G</del> EKP-----                       | 820 |
| CsPAC2         | RDSGII <del>P</del> CPQAEGL <del>P</del> CYGI <del>A</del> GEEFELDIDSIKRGI <del>K</del> ALHAARS <del>G</del> EKV-----                       | 820 |

Supplementary Material (ESI) for Photochemical & Photobiological Sciences

This journal is © The Royal Society of Chemistry and Owner Societies 2004

|                |                                                                 |                                                   |       |
|----------------|-----------------------------------------------------------------|---------------------------------------------------|-------|
| KqPAC2         | QEMGIVPSPQAIDGLPCYGVAGDEFVLDVDTIKRSIKNFHAARS                    | SGEKLNVSGLANGDLEE                                 | 831   |
| EtgPAC2        | RDSGVI PCPQAIEGIPCYGIAGEDYELDIRSIKAGIKQLHAARS                   | SLEDQA-----                                       | 820   |
| EtvPAC2        | RDRGLI PCPQAIEGIPCYGLAGDDFELD IASIKGRIRNLHAMR                   | RAGEKPN-----LPDD                                  | 825   |
|                |                                                                 |                                                   |       |
| PAC $\alpha$   | GTNAPGR----                                                     | GAPAGGIPSSPKVRPPGRTNSVSSYTPDPNEALDPRMAESVFLDMCHQR | 877   |
| AlPAC $\alpha$ | GTNAPGR----                                                     | GAPAAGVPSSPKARALGRTSSVSSYTPDLNETLDPRMAESVFNDLCNQR | 877   |
| KqPAC1         | GMNAPGRALPVASMPAISSPSPKVVRTAGRAASVASYPDLNDLLDPRMAE              | VVFQELCQQR                                        | 881   |
| EsPAC1         | GTNAPG-----                                                     | KSGPAVPSSPKVHHAQGRAGSVASYTPDPNEVLDPRMAEMVFDQMCQHR | 876   |
| CsPAC1         | GTRAPGH----                                                     | AAPAS----PKAQKGAGRANSVASYPDVNELLDPRMAESVVFQELCQQR | 873   |
| EtgPAC1        | AAAAEAG-----                                                    | KPKAKARADSRFGPRGSVNSYCPDPNEVLDPRMAEDVFVEACAAR     | 881   |
| EtvPAC1        | AQEALDA-----                                                    | AAPSPKKGGRGSGRSSVSSYAADPNEVLDPRMAEAAAYTQGCQQR     | 874   |
| EsPAC2         | -----                                                           | -----                                             | ----- |
| PAC $\beta$    | -----                                                           | -----                                             | ----- |
| AlPAC $\beta$  | -----                                                           | -----                                             | ----- |
| CsPAC2         | -----                                                           | -----                                             | ----- |
| KqPAC2         | -----                                                           | -----                                             | ----- |
| EtgPAC2        | -----                                                           | -----                                             | ----- |
| EtvPAC2        | -----                                                           | -----                                             | ----- |
|                |                                                                 |                                                   |       |
| PAC $\alpha$   | GDTANNSIAVKLRQAANDDRLDLGRMLQGPHELMPVMQAIKHLTNLRMLNMSDNFVDDNN    |                                                   | 937   |
| AlPAC $\alpha$ | GDAPNNSIAAKLRQAANDDRLDLGRMLQGPHELMPVLQAIKQLTNLRMLNMSDNFVDDNN    |                                                   | 937   |
| KqPAC1         | GEIPNNAVLLRLRQAHEERADLGRSLQGPHELPPLTQALKQLTNVRALNMSDNFVDDTS     |                                                   | 941   |
| EsPAC1         | GDQPSNAIILMKLRNAAQDDRLDLGRTLQGPHELGPLTQAIKQLTNLKMVNMSDNFIDNDT   |                                                   | 936   |
| CsPAC1         | GDVPNVGISAKLRQAQDDRLDLGRTLQGPHELGPVVQAVKQLTNLKTLLNLSDNFVDDGS    |                                                   | 933   |
| EtgPAC1        | GDAPNLALAKMRQAANDDRLDLARALQGPHELSPLTALKQLCHLRSLNMSDNFIDDDN      |                                                   | 941   |
| EtvPAC1        | GEQPTMAIVNKLRGAGNDTRMDLGRALQGPHELMALCTALKHLTHLRLLNMSDNFVDDNS    |                                                   | 934   |
| EsPAC2         | -----PSADHEENKGNDFRVSPGRVRRSDSGRRSNSAQGKRSTPVR                  | -----                                             | 861   |
| PAC $\beta$    | -----LTEPEEAKP--DFRVSPGRVRRHSDSGRRSNSAQGKRSTQVR                 | -----                                             | 859   |
| AlPAC $\beta$  | -----LALPEEAKQDYRVSPGRMRHSDSGRRSNSAQGKRSTQVR                    | -----                                             | 860   |
| CsPAC2         | -----AVAEPEEKGGDFRVSPGRVRRSDSGRRSNSAQGKRSTPVR                   | -----                                             | 860   |
| KqPAC2         | -----SMTGSPLRATINDFRVSPGRVRRSDSVRRSPSIAGRYGVATR                 | -----                                             | 873   |
| EtgPAC2        | -----AAAAEEEAQAQQQFRVSPGRVRRSDAGRRSNSAQGRRMAPVR                 | -----                                             | 862   |
| EtvPAC2        | -----HEQEDNYKQAQQDFRVSPGRVRRADSGRRSNSAQGRRSAPVR                 | -----                                             | 867   |
|                |                                                                 |                                                   |       |
| PAC $\alpha$   | VGELVESCIPMRSLQVLDLSNPNGLTKVIALKRLIKHNTQVREILLNGTRIPAPTEQRKLQ   |                                                   | 997   |
| AlPAC $\alpha$ | VGELAESCIPMRSLQVLDLSNPNGLTKVIALKRLIKHNTQIREILLNGTRIPAPTEQRKLQ   |                                                   | 997   |
| KqPAC1         | IGDLIESCLAMRSLQMLDLSNPNGLTKVIALKRLIKHNPQLREIHLNGTRIPAPTEQRKLQ   |                                                   | 1001  |
| EsPAC1         | IGDLVEACLMSRSLQVLDLSNPNGLTKTIALKRLIKHNPVREVLLNGTRIPAPTEQRKLQ    |                                                   | 996   |
| CsPAC1         | VGEIVEACLPMRNLQVLDLSNPNGLTKI IALKRLIKHNPAVREILLNGTRVAPTEQRKLQ   |                                                   | 993   |
| EtgPAC1        | VVDLVEACLPMENLQVLDLSNPNGITKI IALKRLVKHNQVIREINLNGTRVAPTEQRKLQ   |                                                   | 1001  |
| EtvPAC1        | IAEIVEACLPMKSLAVLDLSNPNGLTKI IALKRLVKHNPGIKEI ILQGTRIPAPTEQRKLQ |                                                   | 994   |
| EsPAC2         | -----                                                           | -----                                             | ----- |
| PAC $\beta$    | -----                                                           | -----                                             | ----- |
| AlPAC $\beta$  | -----                                                           | -----                                             | ----- |
| CsPAC2         | -----                                                           | -----                                             | ----- |
| KqPAC2         | -----                                                           | -----                                             | ----- |
| EtgPAC2        | -----                                                           | -----                                             | ----- |
| EtvPAC2        | -----                                                           | -----                                             | ----- |
|                |                                                                 |                                                   |       |
| PAC $\alpha$   | SSMNVNRLCAS----                                                 | TDLKGSWKYEH-----                                  | 1019  |
| AlPAC $\alpha$ | SSMNVNRMCAS---                                                  | TDSKS-SHKYDH-----                                 | 1019  |
| KqPAC1         | SSLNVNRLCAS---                                                  | AESKLGSHKYEGAAH----                               | 1027  |
| EsPAC1         | SSMNVNRLTAS---                                                  | DKG--GSHKYDH-----                                 | 1017  |
| CsPAC1         | SSINVNRLCSS---                                                  | TDKGGSHKYESH-----                                 | 1017  |
| EtgPAC1        | SSINVNRLCAS---                                                  | EKR-----                                          | 1015  |
| EtvPAC1        | SSINVNRLCASSPNGAESKAGHKYDQSMSSSHH                               |                                                   | 1027  |
| EsPAC2         | -----                                                           | -----                                             | ----- |
| PAC $\beta$    | -----                                                           | -----                                             | ----- |
| AlPAC $\beta$  | -----                                                           | -----                                             | ----- |

Supplementary Material (ESI) for Photochemical & Photobiological Sciences

This journal is © The Royal Society of Chemistry and Owner Societies 2004

CsPAC2 -----

KqPAC2 -----

EtgPAC2 -----

EtvPAC2 -----
